# Supplementary material
Source: PubMed Central journal article supplement (PMC5727917)
Supplement: NIHMS901399-supplement-Supplement1.pdf [file NIHMS901399-supplement-Supplement1.pdf]

## Supplementary Appendix

This appendix has been provided by the authors to give readers additional information about their work.

Supplement to: Jackson ML, Chung JR, Jackson LA, et al. Influenza vaccine effectiveness in the United States during the 2015–2016 season. *N Engl J Med* 2017;377:534-43. DOI: 10.1056/NEJMoa1700153

**Supplemental Materials:**  
**Influenza vaccine effectiveness in the United States — 2015/16 season**

**Contents**

|                            |    |
|----------------------------|----|
| Acknowledgements.....      | 2  |
| Supplemental Methods.....  | 3  |
| Supplemental Figure .....  | 8  |
| Supplemental Table 1 ..... | 9  |
| Supplemental Table 2 ..... | 12 |
| Supplemental Table 3 ..... | 19 |

## Acknowledgements

*Kaiser Permanente Washington Health Research Institute:* Julia Anderson, Erika L. Kiniry,

Lawrence Madziwa, Matthew Nguyen.

*Centers for Disease Control and Prevention:* LaShondra Berman, Angie Foust, Steve Lindstrom,

Wendy Sessions, Sarah Spencer, Swathi Thaker, Xiyan Xu.

*University of Michigan:* Caroline K. Cheng, Richard Evans, Emileigh Johnson, Anne Kaniclides,

Ryan E. Malosh, E. J. McSpadden, Joshua G. Petrie, Rachel Truscon.

*Marshfield Clinic Research Foundation:* Elizabeth Armagost, Deanna Cole, Terry J Foss, Klevi

Hoxha, Lynn Ivacic, Tami Johnson, Tara Johnson, Jennifer King, Sarah Kopitzke, Karen

McGreevey, Jennifer Meece, Madalyn Minervini, Vicki Moon, Suellyn Murray, Jillette Peterson,

Rebecca Pilsner, DeeAnn Polacek, Carla Rottscheit, Jackie Salzwedel, Sandra Strey, Laurel

Verhagen, Center for Clinical Epidemiology & Population Health Staff, and Integrated Research

& Development Laboratory Staff.

*Baylor Scott & White:* Alejandro Arroliga, Madhava Beeram, Chooihoong Choo, Lydia Clipper,

Deborah Furze, Gabriela Gonzales, Vanessa Hoelscher, Ineshia Jackson, Mary Kylberg, Ashley

Kossie, Lea Mallett, Archana Nanigrani, Joann Nichols, Teresa Ponder, Jessica Pruszynski,

Michael Reis, Cathleen Rivera, Anne Robertson, Meredith Tanner, Donald Wesson, Martha

Zayed.

*University of Pittsburgh:* Arlene Bullotta, G.K. Balasubramani, Heather Eng, Samantha Ford,

Krissy K Moehling, Theresa Sax, Jonathan Steele, Michael Susick

## Supplemental Methods

### *Defining high-risk conditions*

We used International Classification of Diseases (ICD) codes assigned to medical encounters in the year prior to enrollment to define the presence/absence of medical conditions that may increase the risk of severe influenza disease. ICD version 9 was used for encounters prior to October 2015, and ICD version 10 for encounters on or after October 1 2015.

**Table:** ICD codes used to define high-risk medical conditions. Listed codes include all subcodes

| Disease category                                  | ICD-9 codes                                                                                                                                                  | ICD-10 codes                                                                                                                                                           |
|---------------------------------------------------|--------------------------------------------------------------------------------------------------------------------------------------------------------------|------------------------------------------------------------------------------------------------------------------------------------------------------------------------|
| Chronic cardiac diseases and circulatory diseases | 093, 391, 393-398, 402, 404, 410-414, 416, 417, 423-426, 427.1-427.8, 428, 429, 440-444, 446, 447, 745, 746.9, 747, V42.1, V45.0, V45.81, V45.82             | A52.0, I01, I02, I05-I09, I11, I13, I20-I28, I31, I33-I44, I46, I48, I50-I52, I71-I76, I79, I81-I82, I85, I97.0, I97.1, M31, Q20-Q28, Q89.3, R00.1, Z94.1, Z95, Z98.61 |
| Chronic pulmonary diseases                        | 011, 012, 031.0, 135, 277.0, 277.6, 491-496, 500-506, 508, 514-517, 518.1-518.3, 518.6, 518.83, 519.0, 748.4,-748.6, 759.3, 770.2, 770.7, V42.6              | A15, A31.0, B39-B41, B44, B45, B46.0, D86.0, E84, E88.01, J18.2, J41-J45, J47, J60-J70, J80-J82, J84-J86, J95.0, J96, J98.1, J99, P25-P28, Q33, T86.3, T86.8, Z94.2    |
| Diabetes mellitus                                 | 250, 251, 648.0, 357.2, 362.0, 362.11, 36.41                                                                                                                 | E08-E11, E13, O24                                                                                                                                                      |
| Chronic renal disease                             | 403, 581-583, 585-587, 588.0, 588.1, 590.0, V42.0, V45.1, V56                                                                                                | I12, N01-N08, N11, N14-N18, N25, N26, N28, Q27.1, Q27.2, Q60, Z49, Z91.15, Z94.0, Z99.2                                                                                |
| Hemoglobinopathies                                | 282-284                                                                                                                                                      | D55, D56.0-D56.2, D56.4, D56.5, D56.9, D57.0- D57.2, D57.4, D57.8, D58-D61, D64.0-D64.4, D64.8, D65-D68                                                                |
| Immunosuppressive disorders                       | 042, 136.3, 279, 288.0, 288.1, 288.2, 288.4, 446, 710.0, 710.1, 710.2, 710.3, 710.4, 714, V08, V42.2, V42.7, V42.8, V42.9, V42.1, V42.6, V42.0, V58.0, V58.1 | B20, B59, B97.3, D47.Z1, D70-D73, D76, D80-D84, D89, M05-M08, M30-M34, M35.0, M35.9, Q89.0, T45.1X1, Z21, Z48.2, Z51.0, Z51.1, Z94                                     |
| Malignancy                                        | 140-172, 174-208                                                                                                                                             | C00-C26, C30-C34, C37-C41, C43-C58, C60-C86, C88, C90-C96, C4A, C7A, C7B, D03, D46, Z85                                                                                |
| Metabolic diseases, excluding diabetes            | 255, 270, 271, 277                                                                                                                                           | E70-E72, E74, E75.2, E76-E80, E83, E85, E88, E89.1, E89.6                                                                                                              |

|                              |                                                                                                                                      |                                                                                                                                                                                                                                                                                         |
|------------------------------|--------------------------------------------------------------------------------------------------------------------------------------|-----------------------------------------------------------------------------------------------------------------------------------------------------------------------------------------------------------------------------------------------------------------------------------------|
| Liver diseases               | 571, 572.2-572.8                                                                                                                     | B18, K70-K77                                                                                                                                                                                                                                                                            |
| Neurological/Musculoskeletal | 290, 294.1, 318.1, 318.2, 330-332, 333.0, 333.4-333.9, 334-336, 340-343, 344.0, 358.0, 358.1, 359, 756.1, 756.3-756.6, 768.5, 780.72 | H49.81, M12.0, M30, M36.0, A17.0, E75.02, E75.19, E75.4, F01-F03, F71-F73, F84.2, G10-G14, G20, G21, G23-G26, G30-G32, G35-G37, G40, G45, G46, G60-G64, G70, G71, G73, G80-G83, G90.3, G91, G93, G94, G95, G99.2, P91, Q00-Q07, Q76, Q77-Q79, Q85, Q87.4, Q90-Q93, Q96, R41, R53.2, R54 |
| Cerebrovascular disease      | 431-434, 437, 438                                                                                                                    | I60-I63, I68, I69                                                                                                                                                                                                                                                                       |
| Morbid obesity               | 278.01                                                                                                                               | E66.01, E66.2, Z68.4                                                                                                                                                                                                                                                                    |
| Endocrine disorders          |                                                                                                                                      | E00, E01, E03, E05, E06, E15, E16, E20-E29, E31, E32, E34                                                                                                                                                                                                                               |

#### *Influenza vaccination history*

As mentioned in the main manuscript, virus strains recommended for 2015/16 northern hemisphere influenza vaccines were A/California/7/2009 (H1N1pdm09)-like, A/Switzerland/9715293/2013 (H3N2)-like, B/Phuket/3073/2013-like (Yamagata lineage) viruses, and (for quadrivalent vaccines), B/Brisbane/60/2008-like virus (Victoria lineage). The A/Switzerland/9715293/2013-like virus belongs to genetic clade 3C.3a. B/Phuket/3073/2013-like virus belongs to genetic group 3, and B/Brisbane/60/2008-like virus to genetic group 1A. A(H1N1)pdm09 viruses isolated prior to 2011 have not been assigned to genetic groups.

For our primary analyses, we defined influenza vaccination history from a combination of Electronic Immunization Records (EIRs) and self- or parent-reported vaccination data. EIRs included electronic health records from enrollment clinics, employee health records, and state immunization registries. Data extracted from EIRs included vaccine type, date of vaccination, and (where available) lot number, manufacturer, and route of administration. If not specifically available, vaccine type (including LAIV and trivalent/quadrivalent inactivated vaccines, IIV3/IIV4) was derived from manufacturer, lot number, and route of administration. At the all study sites, subjects were considered vaccinated if they had an EIR-documented record of influenza vaccination 14 or more days prior to illness onset. Subjects without EIR-documented vaccination were handled somewhat differently at the study sites, depending on access to and expected completeness of EIR data:

- Wisconsin site: EIR data come from the Registry for Effectively Communicating Immunization Needs (RECIN). This registry combines immunization records from all Marshfield Clinic providers and the Wisconsin Immunization Information System (IIS).

Validity of the REGIN registry has been previously demonstrated.<sup>1</sup> EIR data are assumed to be complete for subjects of all ages, so subjects without EIR-documented vaccination were assumed to be unvaccinated.

- Washington site: EIR data come from Kaiser Permanente Washington's Immunization Registry, which combines data from all Kaiser Permanente Washington providers and the Washington IIS. EIR data are assumed to be complete for children <18 years of age, but vaccinations given to adults at workplaces may be missing from EIR sources.<sup>2</sup> Consistent with sites other than Wisconsin, subjects aged <9 years of age without EIR-documented vaccination were assumed to be unvaccinated. Subjects aged ≥9 years who self-reported vaccination (or had parental self-report of vaccination) at enrollment but for whom EIR documentation was not available were contacted by phone and asked for additional data on influenza vaccination. Subjects aged ≥9 years who provided a plausible vaccination provider and an approximate date of vaccination (termed "plausible self-report") were considered vaccinated; subjects aged ≥9 years not providing a plausible self-report, or who self-reported being unvaccinated in this verification step were assumed to be unvaccinated.
- Michigan site: EIR data come from the University of Michigan and Henry Ford electronic medical records (EMRs) and from the Michigan IIS (Michigan Care Improvement Registry). Subjects with EIR-documented vaccination were assumed to be vaccinated, as were subjects aged ≥9 years with plausible self-report (or plausible parent report) of influenza vaccination at the enrollment interview. Other subjects were considered unvaccinated.
- Texas site: EIR data come from multiple sources, including the Baylor Scott & White electronic medical record, Scott & White Health Plan claims databases, Baylor Scott & White employee immunization records, primary care provider records, retail pharmacies, and the Texas IIS (ImmTrac), an opt-in registry. Subjects with EIR-documented vaccination were assumed to be vaccinated, as were subjects aged ≥9 years with plausible self-report (or plausible parent report) of influenza vaccination at the enrollment interview. Other subjects were considered unvaccinated.
- Pennsylvania site: EIR data come from the University of Pittsburgh Medical Center (UPMC) electronic medical record, UPMC employee vaccination records, Highmark and UPMC claims databases, primary care provider records, and the Pennsylvania IIS. Details on vaccine provider and approximate date of vaccination were collected during enrollment interviews. Subjects with EIR-documented vaccination were assumed to be vaccinated, as were subjects aged ≥9 years with plausible self-report (or plausible parent report) of influenza vaccination at the enrollment interview. Other subjects were considered unvaccinated.

---

<sup>1</sup> Irving SA, Donohue JG, Shay DK, Ellis-Coyle TL, Belongia EA. "Evaluation of self-reported and registry-based influenza vaccination status in a Wisconsin cohort." *Vaccine* 2009; 27(47):6546-9

<sup>2</sup> Centers for Disease Control Prevention. "Progress in immunization information systems - United States, 2012." *MMWR Morb Mort Wkly Rep*; 2013;62:1005-8.

At the Wisconsin site, vaccine type (inactivated vs. live attenuated) was defined from EIR data only. At all other sites, vaccine type was defined from EIR data if vaccine type was available in the EIR (3,148 subjects), or by self-reported vaccine type otherwise (234 subjects). Subjects aged  $\geq 50$  years without EIR-documented vaccine type were assumed to have received inactivated vaccine (14 subjects).

### *Laboratory testing*

Respiratory specimens (combined nasal and oropharyngeal swabs for subjects aged  $\geq 2$  years, nasal swabs for subjects aged  $< 2$  years) were collected from all study subjects. Specimens were collected for research purposes only and are independent of any specimens collected for clinical testing. Thus, the decision to test for influenza was not subject to a provider's discretion. Specimens were tested for influenza via real time reverse transcriptase polymerase chain reaction (RT-PCR) at each of the study sites. The exception was the Washington site; specimens from subjects enrolled at the Washington site were frozen at  $-70^{\circ}\text{C}$  and shipped to the Wisconsin site for testing. RT-PCR testing followed a common protocol across all study sites using probes and primers provided by the Centers for Disease Control and Prevention (CDC).

### *Analysis*

- **Missing data:** As indicated in Table 1, we had complete data on exposure, outcome, and covariates for the final adjusted model (age, study site, high-risk status, and illness onset). Among other potential confounders examined, missing data were uncommon (Table 1). Body mass index (BMI) had the greatest proportion of subjects with missing data (2%). When assessing these covariates as potential confounders in multivariable models, observations with missing values for these covariates were excluded.
- **Model fit:** We used the Hosmer-Lemeshow statistic as a measure of goodness of fit. The Hosmer-Lemeshow test statistic was not significant in either the final adjusted model presented in the main paper ( $p=0.08$ ) or the comparison-adjusted model presented in supplemental materials ( $p=0.51$ ) indicating there was not enough evidence to indicate the models had lack of fit.
- **Sample size:** Sample size was chosen in order to estimate VE with reasonable precision ( $\pm 15\%$ ) overall and to detect statistically significant VE within pre-defined age groups. Each study site was required to enroll at least 800 subjects per season, with at least 200 in each of the following age groups: 6 months to 18 years, 19 to 49 years, and  $\geq 50$  years. Assuming that 25% of subjects would test positive for influenza, assuming 40% of subjects would be vaccinated, and assuming a true VE of 50%, this sample size would enable estimation of a VE of 50% (95% CI, 35% to 66%) with type I error rate of 0.05. It would also give us at least

80% power to reject the null hypothesis of no VE in each of the pre-defined age group with type I error rate of 0.05.



Supplemental Figure

**Supplemental Figure:** Enrolled subjects, stratified by onset week and influenza test results

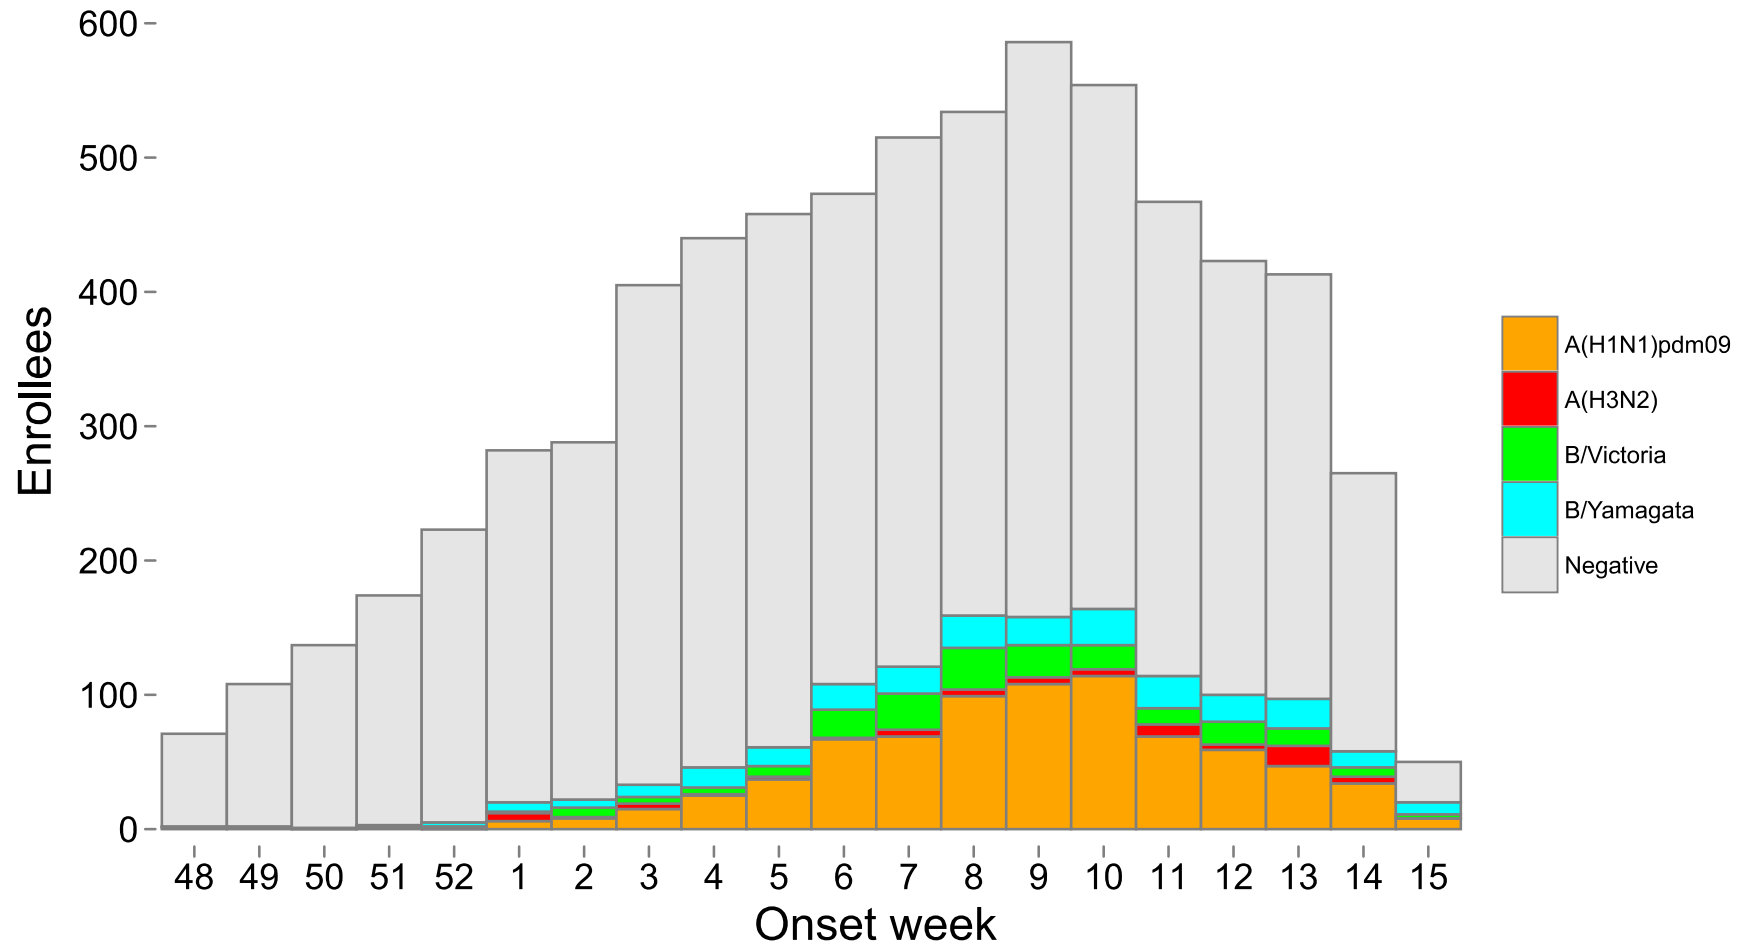

## Supplemental Table 1

Descriptive characteristics of study participants with medically attended acute respiratory illness, by lab-confirmed influenza virus infection status. Numbers are counts (column percentage) unless otherwise indicated

| Characteristic          | Influenza negative<br>(N=5570) | Influenza positive<br>(N=1309) | Influenza A(H1N1)pdm09<br>(N=768) | Influenza A(H3N2)<br>(N=72) | Influenza B/Yamagata<br>(N=253) | Influenza B/Victoria<br>(N=200) |
|-------------------------|--------------------------------|--------------------------------|-----------------------------------|-----------------------------|---------------------------------|---------------------------------|
| <b>Age</b>              |                                |                                |                                   |                             |                                 |                                 |
| <9 years                | 1,272 (23%)                    | 254 (19%)                      | 160 (21%)                         | 6 (8%)                      | 34 (13%)                        | 55 (28%)                        |
| 9-17 years              | 694 (12%)                      | 164 (13%)                      | 51 (7%)                           | 6 (8%)                      | 37 (15%)                        | 70 (35%)                        |
| 18-49 years             | 1,957 (35%)                    | 499 (38%)                      | 311 (40%)                         | 34 (47%)                    | 91 (36%)                        | 52 (26%)                        |
| 50-64 years             | 918 (16%)                      | 283 (22%)                      | 194 (25%)                         | 13 (18%)                    | 64 (25%)                        | 8 (4%)                          |
| ≥65 years               | 729 (13%)                      | 109 (8%)                       | 52 (7%)                           | 13 (18%)                    | 27 (11%)                        | 15 (8%)                         |
| <b>Male sex</b>         |                                |                                |                                   |                             |                                 |                                 |
|                         | 2,236 (40%)                    | 597 (46%)                      | 346 (45%)                         | 32 (44%)                    | 119 (47%)                       | 95 (48%)                        |
| <b>Study site</b>       |                                |                                |                                   |                             |                                 |                                 |
| Michigan                | 751 (13%)                      | 243 (19%)                      | 181 (24%)                         | 10 (14%)                    | 23 (9%)                         | 30 (15%)                        |
| Pennsylvania            | 1,254 (23%)                    | 356 (27%)                      | 252 (33%)                         | 8 (11%)                     | 60 (24%)                        | 31 (16%)                        |
| Texas                   | 1,147 (21%)                    | 192 (15%)                      | 54 (7%)                           | 17 (24%)                    | 31 (12%)                        | 89 (45%)                        |
| Washington              | 1,399 (25%)                    | 321 (25%)                      | 97 (13%)                          | 37 (51%)                    | 129 (51%)                       | 49 (25%)                        |
| Wisconsin               | 1,019 (18%)                    | 197 (15%)                      | 184 (24%)                         | (0%)                        | 10 (4%)                         | 1 (1%)                          |
| <b>Race/ethnicity</b>   |                                |                                |                                   |                             |                                 |                                 |
| White, non-Hispanic     | 4,233 (76%)                    | 919 (70%)                      | 567 (74%)                         | 52 (72%)                    | 175 (69%)                       | 111 (56%)                       |
| Black, non-Hispanic     | 402 (7%)                       | 157 (12%)                      | 101 (13%)                         | 4 (6%)                      | 25 (10%)                        | 25 (13%)                        |
| Other, non-Hispanic     | 456 (8%)                       | 132 (10%)                      | 60 (8%)                           | 10 (14%)                    | 32 (13%)                        | 30 (15%)                        |
| Hispanic                | 455 (8%)                       | 98 (7%)                        | 38 (5%)                           | 6 (8%)                      | 20 (8%)                         | 34 (17%)                        |
| Unknown                 | 24 (0%)                        | 3 (0%)                         | 2 (0%)                            | (0%)                        | 1 (0%)                          | (0%)                            |
| <b>Body Mass Index*</b> |                                |                                |                                   |                             |                                 |                                 |
| <18.5                   | 34 (1%)                        | 8 (1%)                         | 5 (1%)                            | 1 (2%)                      | (0%)                            | 2 (3%)                          |
| 18.5–24.9               | 838 (23%)                      | 238 (27%)                      | 144 (26%)                         | 18 (30%)                    | 49 (27%)                        | 20 (27%)                        |

|                                                          |             |            |            |            |            |            |
|----------------------------------------------------------|-------------|------------|------------|------------|------------|------------|
| 25–29.9                                                  | 984 (27%)   | 271 (30%)  | 168 (30%)  | 21 (35%)   | 56 (31%)   | 20 (27%)   |
| 30–30.9                                                  | 1,246 (35%) | 266 (30%)  | 165 (30%)  | 17 (28%)   | 60 (33%)   | 22 (29%)   |
| ≥40                                                      | 440 (12%)   | 88 (10%)   | 64 (11%)   | 3 (5%)     | 11 (6%)    | 8 (11%)    |
| Unknown                                                  | 62 (2%)     | 20 (2%)    | 11 (2%)    | (0%)       | 6 (3%)     | 3 (4%)     |
| Any high-risk condition†                                 | 2,137 (38%) | 439 (34%)  | 270 (35%)  | 30 (42%)   | 89 (35%)   | 40 (20%)   |
| Asthma/pulmonary high-risk condition                     | 1,086 (19%) | 204 (16%)  | 121 (16%)  | 13 (18%)   | 41 (16%)   | 26 (13%)   |
| Cardiovascular high-risk condition                       | 618 (11%)   | 104 (8%)   | 66 (9%)    | 5 (7%)     | 21 (8%)    | 9 (5%)     |
| Diabetes high-risk condition                             | 422 (8%)    | 79 (6%)    | 57 (7%)    | 3 (4%)     | 12 (5%)    | 6 (3%)     |
| BMI ≥40                                                  | 308 (6%)    | 58 (4%)    | 44 (6%)    | 2 (3%)     | 7 (3%)     | 5 (3%)     |
| Other high-risk condition                                | 1,097 (20%) | 229 (17%)  | 151 (20%)  | 16 (22%)   | 43 (17%)   | 13 (7%)    |
| General health status                                    |             |            |            |            |            |            |
| Excellent                                                | 1,783 (32%) | 488 (37%)  | 272 (35%)  | 22 (31%)   | 94 (37%)   | 94 (47%)   |
| Very good                                                | 2,048 (37%) | 483 (37%)  | 290 (38%)  | 23 (32%)   | 94 (37%)   | 72 (36%)   |
| Good                                                     | 1,348 (24%) | 267 (20%)  | 159 (21%)  | 20 (28%)   | 53 (21%)   | 28 (14%)   |
| Fair/Poor                                                | 387 (7%)    | 70 (5%)    | 45 (6%)    | 7 (10%)    | 12 (5%)    | 6 (3%)     |
| Missing                                                  | 4 (0%)      | 1 (0%)     | 1 (0%)     | (0%)       | (0%)       | (0%)       |
| Smoker                                                   | 490 (9%)    | 103 (8%)   | 79 (10%)   | 3 (4%)     | 11 (4%)    | 7 (4%)     |
| Exposure to smoke                                        | 1,121 (20%) | 223 (17%)  | 140 (18%)  | 9 (13%)    | 33 (13%)   | 40 (20%)   |
| Interval from onset to enrollment                        |             |            |            |            |            |            |
| <3 days                                                  | 1,540 (28%) | 525 (40%)  | 351 (46%)  | 29 (40%)   | 64 (25%)   | 77 (39%)   |
| 3–4 days                                                 | 2,176 (39%) | 516 (39%)  | 287 (37%)  | 28 (39%)   | 110 (43%)  | 87 (44%)   |
| 5–7 days                                                 | 1,854 (33%) | 268 (20%)  | 130 (17%)  | 15 (21%)   | 79 (31%)   | 36 (18%)   |
| Current health assessment (median, interquartile range)‡ | 60 (45-75)  | 50 (35-70) | 50 (30-65) | 50 (35-65) | 50 (40-70) | 50 (40-70) |
| Education                                                |             |            |            |            |            |            |

|                                                                  |             |           |           |          |          |          |
|------------------------------------------------------------------|-------------|-----------|-----------|----------|----------|----------|
| Less than high school graduate                                   | 219 (4%)    | 28 (2%)   | 15 (2%)   | (0%)     | 3 (1%)   | 10 (5%)  |
| Graduated high school (or obtained GED)                          | 1,126 (20%) | 241 (18%) | 163 (21%) | 12 (17%) | 36 (14%) | 28 (14%) |
| Some college (including vocational training, associate's degree) | 2,061 (37%) | 478 (37%) | 282 (37%) | 30 (42%) | 90 (36%) | 72 (36%) |
| Bachelor's degree                                                | 1,234 (22%) | 324 (25%) | 182 (24%) | 15 (21%) | 69 (27%) | 56 (28%) |
| Advanced degree                                                  | 914 (16%)   | 235 (18%) | 125 (16%) | 15 (21%) | 54 (21%) | 33 (17%) |
| Unknown                                                          | 16 (0%)     | 3 (0%)    | 1 (0%)    | (0%)     | 1 (0%)   | 1 (1%)   |
| Vaccinated                                                       | 2,902 (52%) | 494 (38%) | 308 (40%) | 30 (42%) | 91 (36%) | 59 (30%) |

\* BMI was calculated as kg/m<sup>2</sup> from height and weight recorded in electronic health records, for adults ≥18 years of age only

†Presence of high-risk health conditions were defined as the presence of ≥1 medical record-documented high risk code (ICD-9 prior to 10/1/2015, ICD-10 subsequently) in the year prior to enrollment

‡Current health assessment was missing for 5 influenza negatives, 2 B/Yamagata positive cases, and 1 B/Victoria positive case

## Supplemental Table 2

Crude and adjusted estimates of influenza vaccine effectiveness, overall and stratified by age group, vaccine type, and virus type/subtype/lineage

| Influenza (sub)type/Age group/Vaccine type | Influenza Positive |      | Influenza Negative |      | Vaccine effectiveness |            |                |            |
|--------------------------------------------|--------------------|------|--------------------|------|-----------------------|------------|----------------|------------|
|                                            | Vaccinated/Total   | (%)  | Vaccinated/Total   | (%)  | Crude (%)             | (95% CI)   | Adjusted* VE % | 95% CI     |
| <b>Influenza A and B</b>                   |                    |      |                    |      |                       |            |                |            |
| <i>Any vaccine</i>                         |                    |      |                    |      |                       |            |                |            |
| Overall                                    | 494/1309           | 37.7 | 2902/5570          | 52.1 | 44%                   | (37 to 51) | 48%            | (41 to 55) |
| 6 months - 8 years                         | 87/254             | 34.3 | 630/1272           | 49.5 | 47%                   | (30 to 60) | 51%            | (33 to 64) |
| 2-8 years                                  | 75/228             | 32.9 | 436/961            | 45.4 | 41%                   | (20 to 56) | 48%            | (27 to 63) |
| 2-17 years                                 | 108/392            | 27.6 | 713/1655           | 43.1 | 50%                   | (36 to 61) | 52%            | (38 to 63) |
| 9-17 years                                 | 33/164             | 20.1 | 277/694            | 39.9 | 62%                   | (43 to 75) | 59%            | (36 to 74) |
| 18-49 years                                | 146/499            | 29.3 | 841/1957           | 43.0 | 45%                   | (32 to 56) | 52%            | (39 to 61) |
| 50-64 years                                | 150/283            | 53.0 | 562/918            | 61.2 | 29%                   | (7 to 45)  | 26%            | (2 to 44)  |
| ≥65 years                                  | 78/109             | 71.6 | 592/729            | 81.2 | 42%                   | (8 to 63)  | 42%            | (6 to 64)  |
| <i>By study site</i>                       |                    |      |                    |      |                       |            |                |            |
| Michigan                                   | 118/243            | 48.6 | 421/751            | 56.1 | 26%                   | (1 to 45)  | 29%            | (2 to 49)  |
| Pennsylvania                               | 126/356            | 35.4 | 602/1254           | 48   | 41%                   | (24 to 53) | 42%            | (23 to 56) |
| Texas                                      | 52/192             | 27.1 | 503/1147           | 43.9 | 52%                   | (33 to 66) | 50%            | (28 to 66) |
| Washington                                 | 116/321            | 36.1 | 820/1399           | 58.6 | 60%                   | (49 to 69) | 64%            | (52 to 73) |
| Wisconsin                                  | 82/197             | 41.6 | 556/1019           | 54.6 | 41%                   | (19 to 56) | 46%            | (24 to 62) |
| <i>Any inactivated vaccine (IIV)</i>       |                    |      |                    |      |                       |            |                |            |
| Overall                                    | 456/1271           | 35.9 | 2779/5447          | 51.0 | 46%                   | (39 to 53) | 51%            | (44 to 57) |
| 6 months - 8 years                         | 62/229             | 27.1 | 564/1206           | 46.8 | 58%                   | (42 to 69) | 59%            | (42 to 71) |
| 2-8 years                                  | 50/203             | 24.5 | 370/895            | 41.3 | 54%                   | (34 to 67) | 56%            | (37 to 70) |

|                                                       |          |      |           |      |      |             |     |             |
|-------------------------------------------------------|----------|------|-----------|------|------|-------------|-----|-------------|
| 2-17 years                                            | 73/357   | 20.5 | 609/1551  | 39.3 | 60%  | (48 to 70)  | 60% | (47 to 70)  |
| 9-17 years                                            | 23/154   | 14.9 | 239/656   | 36.4 | 69%  | (51 to 81)  | 66% | (44 to 80)  |
| 18-49 years                                           | 143/496  | 28.8 | 822/1938  | 42.4 | 45%  | (32 to 56)  | 52% | (39 to 62)  |
| 50-64 years                                           | 150/283  | 53.0 | 562/918   | 61.2 | 29%  | (7 to 45)   | 26% | (2 to 44)   |
| ≥65 years                                             | 78/109   | 71.6 | 592/729   | 81.2 | 42%  | (8 to 63)   | 42% | (6 to 64)   |
| <i>IIV3 only†</i>                                     |          |      |           |      |      |             |     |             |
| Overall                                               | 140/955  | 14.7 | 850/3518  | 24.2 | 46%  | (24 to 56)  | 41% | (25 to 53)  |
| 6 months - 17 years                                   | 19/317   | 6.0  | 218/1277  | 17.1 | 69%  | (50 to 81)  | 56% | (22 to 75)  |
| 18-49 years                                           | 29/382   | 7.6  | 149/1265  | 11.8 | 38%  | (7 to 59)   | 38% | (1 to 61)   |
| 50-64 years                                           | 47/180   | 26.1 | 121/477   | 25.4 | -4%  | (-54 to 30) | -5% | (-68 to 34) |
| ≥65 years                                             | 45/76    | 59.2 | 362/499   | 72.6 | 45%  | (10 to 67)  | 42% | (0 to 66)   |
| <i>IIV3 SD only</i>                                   |          |      |           |      |      |             |     |             |
| Overall                                               | 110/925  | 11.9 | 671/3339  | 20.1 | 46%  | (33 to 57)  | 41% | (24 to 54)  |
| ≥65 years                                             | 15/46    | 32.6 | 186/323   | 57.6 | 64%  | (31 to 81)  | 68% | (30 to 85)  |
| <i>IIV3 HD only</i>                                   |          |      |           |      |      |             |     |             |
| ≥65 years                                             | 30/61    | 49.2 | 176/313   | 56.2 | 25%  | (-30 to 57) | 11% | (-70 to 54) |
| <i>IIV4 only</i>                                      |          |      |           |      |      |             |     |             |
| Overall                                               | 257/1072 | 24.0 | 1628/4296 | 37.9 | 48%  | (40 to 56)  | 54% | (45 to 61)  |
| 6 months - 8 years                                    | 45/212   | 21.2 | 399/1041  | 38.3 | 57%  | (38 to 70)  | 61% | (41 to 73)  |
| 9-17 years                                            | 18/149   | 12.1 | 158/575   | 27.5 | 64%  | (39 to 79)  | 67% | (41 to 81)  |
| 18-49 years                                           | 86/439   | 19.6 | 535/1651  | 32.4 | 49%  | (34 to 61)  | 56% | (41 to 67)  |
| 50-64 years                                           | 79/212   | 37.3 | 348/704   | 49.4 | 39%  | (17 to 56)  | 33% | (6 to 53)   |
| ≥65 years                                             | 29/60    | 48.3 | 188/325   | 57.9 | 32%  | (-18 to 61) | 24% | (-44 to 60) |
| <i>Live attenuated influenza vaccine (LAIV4) only</i> |          |      |           |      |      |             |     |             |
| Overall (2-49 y)                                      | 37/674   | 5.5  | 107/2165  | 4.9  | -12% | (-64 to 24) | 4%  | (-47 to 37) |
| 2 years - 17 years                                    | 35/319   | 11   | 101/1043  | 9.7  | -15% | (-73 to 23) | 5%  | (-47 to 39) |

|                               |         |      |           |      |      |              |     |             |
|-------------------------------|---------|------|-----------|------|------|--------------|-----|-------------|
| 2 years - 8 years             | 25/178  | 14.0 | 63/588    | 10.7 | -36% | (-124 to 17) | 0%  | (-75 to 43) |
| 9-17 years                    | 10/141  | 7.1  | 38/455    | 8.4  | 16%  | (-72 to 59)  | 17% | (-84 to 63) |
| <b>Influenza A(H1N1pdm09)</b> |         |      |           |      |      |              |     |             |
| <i>Any vaccine</i>            |         |      |           |      |      |              |     |             |
| Overall                       | 308/768 | 40.1 | 2902/5570 | 52.1 | 38%  | (28 to 47)   | 45% | (34 to 53)  |
| 6 months - 8 years            | 58/160  | 36.3 | 630/1272  | 49.5 | 42%  | (19 to 59)   | 49% | (26 to 65)  |
| 2-8 years                     | 47/139  | 33.8 | 436/961   | 45.4 | 38%  | (11 to 58)   | 48% | (22 to 65)  |
| 2-17 years                    | 58/190  | 30.5 | 713/1655  | 43.1 | 42%  | (20 to 58)   | 53% | (33 to 67)  |
| 9-17 years                    | 11/51   | 21.6 | 277/694   | 39.9 | 59%  | (18 to 79)   | 63% | (22 to 82)  |
| 18-49 years                   | 98/311  | 31.5 | 841/1957  | 43.0 | 39%  | (21 to 53)   | 46% | (29 to 59)  |
| 50-64 years                   | 110/194 | 56.7 | 562/918   | 61.2 | 17%  | (-13 to 39)  | 10% | (-26 to 36) |
| ≥65 years                     | 31/52   | 59.6 | 592/729   | 81.2 | 66%  | (39 to 81)   | 66% | (36 to 81)  |
| <i>Any IIV</i>                |         |      |           |      |      |              |     |             |
| Overall                       | 286/746 | 38.3 | 2779/5447 | 51.0 | 40%  | (30 to 49)   | 47% | (37 to 56)  |
| 6 months - 8 years            | 41/143  | 28.7 | 564/1206  | 46.8 | 54%  | (33 to 69)   | 59% | (38 to 73)  |
| 2-8 years                     | 30/122  | 24.6 | 370/895   | 41.3 | 54%  | (29 to 70)   | 59% | (36 to 74)  |
| 2-17 years                    | 38/170  | 22.4 | 609/1551  | 39.3 | 55%  | (35 to 69)   | 63% | (45 to 75)  |
| 9-17 years                    | 8/48    | 16.7 | 239/656   | 36.4 | 65%  | (24 to 84)   | 68% | (27 to 86)  |
| 18-49 years                   | 96/309  | 31.1 | 822/1938  | 42.4 | 39%  | (21 to 53)   | 46% | (29 to 59)  |
| 50-64 years                   | 110/194 | 56.7 | 562/918   | 61.2 | 17%  | (-13 to 39)  | 10% | (-26 to 36) |
| ≥65 years                     | 31/52   | 59.6 | 592/729   | 81.2 | 66%  | (39 to 81)   | 66% | (36 to 81)  |
| <i>IIV3 only</i>              |         |      |           |      |      |              |     |             |
| Overall                       | 99/559  | 17.7 | 850/3518  | 24.2 | 32%  | (15 to 46)   | 45% | (28 to 58)  |
| 6 months - 17 years           | 15/157  | 9.6  | 218/1277  | 17.1 | 49%  | (11 to 70)   | 64% | (32 to 81)  |
| 18-49 years                   | 23/236  | 9.8  | 149/1265  | 11.8 | 19%  | (-28 to 49)  | 37% | (-7 to 62)  |
| 50-64 years                   | 40/124  | 32.3 | 121/477   | 25.4 | -40% | (-115 to 9)  | -5% | (-76 to 38) |
| ≥65 years                     | 21/42   | 50.0 | 362/499   | 72.6 | 62%  | (29 to 80)   | 62% | (24 to 81)  |

|                                      |         |      |           |      |      |              |      |              |
|--------------------------------------|---------|------|-----------|------|------|--------------|------|--------------|
| <i>IIV3 SD only</i>                  |         |      |           |      |      |              |      |              |
| Overall                              |         |      |           |      |      |              |      |              |
| ≥65 years                            | 9/30    | 30.0 | 186/323   | 57.6 | 68%  | (29 to 86)   | 76%  | (38 to 90)   |
| <i>IIV3 HD only</i>                  |         |      |           |      |      |              |      |              |
| ≥65 years                            | 12/33   | 36.4 | 176/313   | 56.2 | 56%  | (6 to 79)    | 42%  | (-40 to 76)  |
| <b><i>IIV4 only</i></b>              |         |      |           |      |      |              |      |              |
| Overall                              | 150/610 | 24.6 | 1628/4296 | 37.9 | 47%  | (35 to 56)   | 49%  | (37 to 59)   |
| 6 months - 17 years                  | 33/175  | 18.9 | 557/1616  | 34.5 | 56%  | (35 to 70)   | 60%  | (38 to 74)   |
| 18-49 years                          | 55/268  | 20.5 | 535/1654  | 32.4 | 46%  | (26 to 61)   | 49%  | (28 to 64)   |
| 50-64 years                          | 53/137  | 38.7 | 348/704   | 49.4 | 35%  | (6 to 56)    | 18%  | (-26 to 47)  |
| ≥65 years                            | 9/30    | 30.0 | 188/325   | 57.9 | 69%  | (30 to 86)   | 66%  | (12 to 87)   |
| <i>LAIV4 only</i>                    |         |      |           |      |      |              |      |              |
| Overall                              | 21/366  | 5.7  | 107/2165  | 4.9  | -17% | (-89 to 28)  | -22% | (-110 to 29) |
| 2 years - 17 years                   | 20/152  | 13.2 | 101/1043  | 9.7  | -41% | (-136 to 15) | -19% | (-113 to 33) |
| 2 years - 8 years                    | 17/109  | 15.6 | 63/588    | 10.7 | -54% | (-175 to 14) | -33% | (-161 to 32) |
| <b>Influenza A(H3N2)‡</b>            |         |      |           |      |      |              |      |              |
| <i>Any vaccine</i>                   |         |      |           |      |      |              |      |              |
| Overall                              | 30/72   | 41.7 | 2346/4551 | 51.6 | 33%  | (-8 to 58)   | 43%  | (4 to 66)    |
| 6 months - 17 years                  | 1/12    | 8.3  | 668/1507  | 44.3 | 89%  | (11 to 99)   | 90%  | (14 to 99)   |
| ≥18 years                            | 29/60   | 48.3 | 1678/3044 | 55.1 | 24%  | (-27 to 54)  | 25%  | (-31 to 57)  |
| <b>Influenza A(H3N2) clade 3C.2a</b> |         |      |           |      |      |              |      |              |
| <i>Any vaccine</i>                   |         |      |           |      |      |              |      |              |
| Overall                              | 9/26    | 34.6 | 2346/4551 | 51.6 | 50%  | (-12 to 78)  | 58%  | (-2 to 82)   |
| <b>Influenza A(H3N2) clade 3C.3a</b> |         |      |           |      |      |              |      |              |



|                     |         |      |           |      |      |              |      |              |
|---------------------|---------|------|-----------|------|------|--------------|------|--------------|
| <i>Any vaccine</i>  |         |      |           |      |      |              |      |              |
| Overall             | 13/33   | 39.4 | 2346/4551 | 51.6 | 39%  | (-23 to 70)  | 52%  | (-4 to 78)   |
| <b>Influenza B</b>  |         |      |           |      |      |              |      |              |
| <i>Any vaccine</i>  |         |      |           |      |      |              |      |              |
| Overall             | 150/456 | 32.9 | 2902/5570 | 52.1 | 55%  | (45 to 63)   | 55%  | (44 to 64)   |
| 6 months - 8 years  | 29/89   | 32.6 | 630/1272  | 49.5 | 51%  | (22 to 69)   | 50%  | (17 to 70)   |
| 2-8 years           | 28/84   | 33.3 | 436/961   | 45.4 | 40%  | (4 to 62)    | 43%  | (5 to 66)    |
| 2-17 years          | 50/191  | 26.2 | 713/1655  | 43.1 | 53%  | (34 to 67)   | 48%  | (25 to 64)   |
| 9-17 years          | 22/107  | 20.6 | 277/694   | 39.9 | 61%  | (36 to 76)   | 53%  | (19 to 73)   |
| 18-49 years         | 31/145  | 21.4 | 841/1957  | 43.0 | 64%  | (46 to 76)   | 68%  | (51 to 79)   |
| 50-64 years         | 32/73   | 43.8 | 562/918   | 61.2 | 51%  | (20 to 69)   | 48%  | (14 to 69)   |
| ≥65 years           | 36/42   | 85.7 | 592/729   | 81.2 | -39% | (-236 to 43) | -34% | (-236 to 47) |
| <i>Any IIV</i>      |         |      |           |      |      |              |      |              |
| Overall             | 134/440 | 30.5 | 2779/5447 | 51.0 | 58%  | (48 to 66)   | 58%  | (47 to 67)   |
| 6 months - 8 years  | 21/81   | 25.9 | 564/1206  | 46.7 | 60%  | (34 to 76)   | 54%  | (20 to 74)   |
| 2-8 years           | 20/76   | 26.3 | 370/895   | 41.3 | 49%  | (14 to 70)   | 46%  | (5 to 70)    |
| 2-17 years          | 35/176  | 19.9 | 609/1551  | 39.3 | 62%  | (44 to 74)   | 54%  | (31 to 69)   |
| 9-17 years          | 15/100  | 15.0 | 239/656   | 36.4 | 69%  | (45 to 83)   | 61%  | (28 to 79)   |
| 18-49 years         | 30/144  | 20.8 | 822/1938  | 42.4 | 64%  | (46 to 76)   | 69%  | (52 to 80)   |
| 50-64 years         | 32/73   | 43.8 | 562/918   | 61.2 | 51%  | (20 to 69)   | 48%  | (14 to 69)   |
| ≥65 years           | 36/42   | 85.7 | 592/729   | 81.2 | -39% | (-236 to 43) | -34% | (-236 to 47) |
| <i>IIV3 only</i>    |         |      |           |      |      |              |      |              |
| Overall             | 37/343  | 10.8 | 850/3518  | 24.2 | 62%  | (46 to 73)   | 17%  | (-31 to 47)  |
| 6 months - 17 years | 4/149   | 2.7  | 218/1277  | 17.1 | 87%  | (63 to 95)   | -4%  | (-248 to 69) |
| 18-49 years         | 5/119   | 4.2  | 149/1265  | 11.8 | 67%  | (18 to 87)   | 31%  | (-83 to 74)  |
| 50-64 years         | 7/48    | 14.6 | 121/477   | 25.4 | 50%  | (-15 to 78)  | -17% | (-210 to 56) |
| ≥65 years           | 21/27   | 77.8 | 362/499   | 72.6 | -32% | (-235 to 48) | -55% | (-317 to 42) |

|                                |        |      |           |      |      |               |      |               |  |
|--------------------------------|--------|------|-----------|------|------|---------------|------|---------------|--|
| <i>IIV3 SD only</i>            |        |      |           |      |      |               |      |               |  |
| Overall                        |        |      |           |      |      |               |      |               |  |
| ≥65 years                      | 5/11   | 45.5 | 186/323   | 57.6 | 39%  | (-105 to 82)  | 4%   | (-344 to 79)  |  |
| <i>IIV3 HD only</i>            |        |      |           |      |      |               |      |               |  |
| ≥65 years                      | 16/22  | 72.7 | 176/313   | 56.2 | -    | (-445 to 21)  | -92% | (-459 to 34)  |  |
| <i>IIV4 only</i>               |        |      |           |      |      |               |      |               |  |
| Overall                        | 81/387 | 20.9 | 1628/4296 | 37.9 | 57%  | (44 to 66)    | 63%  | (51 to 71)    |  |
| 6 months - 8 years             | 18/78  | 23.1 | 399/1041  | 38.3 | 52%  | (17 to 72)    | 58%  | (25 to 77)    |  |
| 9-17 years                     | 12/97  | 12.4 | 158/575   | 27.5 | 63%  | (30 to 80)    | 67%  | (34 to 83)    |  |
| 18-49 years                    | 19/133 | 14.3 | 535/1651  | 32.4 | 65%  | (43 to 79)    | 73%  | (55 to 84)    |  |
| 50-64 years                    | 20/61  | 32.8 | 348/704   | 49.4 | 50%  | (13 to 71)    | 52%  | (13 to 74)    |  |
| ≥65 years                      | 12/18  | 66.7 | 188/325   | 57.9 | -46% | (-298 to 47)  | -14% | (-243 to 62)  |  |
| <i>LAIV4 only</i>              |        |      |           |      |      |               |      |               |  |
| Overall 2–49 years             | 16/271 | 5.9  | 107/2165  | 4.9  | -21% | (-107 to 30)  | 20%  | (-46 to 56)   |  |
| 2 years - 17 years             | 15/156 | 9.6  | 101/1043  | 9.7  | 1%   | (-76 to 44)   | 18%  | (-52 to 56)   |  |
| 2 years - 8 years              | 8/64   | 12.5 | 63/588    | 10.7 | -19% | (-161 to 46)  | 26%  | (-78 to 69)   |  |
| 9-17 years                     | 7/92   | 7.6  | 38/455    | 8.4  | 10%  | (-109 to 61)  | 15%  | (-121 to 67)  |  |
| <b>Influenza B/Victoria§</b>   |        |      |           |      |      |               |      |               |  |
| <i>Any vaccine</i>             | 59/200 | 29.5 | 2902/5570 | 52.1 | 62%  | (48 to 72)    | 49%  | (30 to 64)    |  |
| <i>Any IIV</i>                 | 52/193 | 26.9 | 2779/5447 | 51.0 | 65%  | (51 to 74)    | 52%  | (32 to 66)    |  |
| <i>IIV3 only</i>               | 14/155 | 9.0  | 366/2571  | 14.2 | 40%  | (-5 to 66)    | -99% | (-311 to 4)   |  |
| <i>IIV3 HD only, ≥65 years</i> | 7/8    | 87.5 | 170/279   | 60.9 | -    | (-3598 to 46) | -    | (-3701 to 61) |  |
| <i>IIV4 only</i>               | 36/177 | 20.3 | 1600/3805 | 42.1 | 65%  | (49 to 76)    | 57%  | (36 to 71)    |  |
| <i>LAIV4 only</i>              | 7/139  | 5.0  | 94/1791   | 5.3  | 4%   | (-111 to 56)  | 30%  | (-62 to 69)   |  |
| <b>Influenza B/Yamagata</b>    |        |      |           |      |      |               |      |               |  |

|                                |        |      |           |      |      |              |      |              |
|--------------------------------|--------|------|-----------|------|------|--------------|------|--------------|
| <i>Any vaccine</i>             | 91/253 | 36.0 | 2902/5570 | 52.1 | 48%  | (33 to 60)   | 57%  | (42 to 67)   |
| <i>Any IIV</i>                 | 82/244 | 33.6 | 2779/5447 | 51.0 | 51%  | (36 to 63)   | 60%  | (47 to 71)   |
| <i>IIV3 only</i>               | 23/185 | 12.4 | 850/3518  | 24.2 | 55%  | (31 to 71)   | 41%  | (-2 to 66)   |
| <i>IIV3 HD only, ≥65 years</i> | 9/14   | 64.3 | 176/313   | 56.2 | -40% | (-328 to 54) | -37% | (-389 to 62) |
| <i>IIV4 only</i>               | 45/207 | 21.7 | 1628/4296 | 37.9 | 54%  | (36 to 67)   | 66%  | (51 to 76)   |
| <i>LAIV4 only</i>              | 9/130  | 6.9  | 107/2165  | 4.9  | -43% | (-190 to 29) | -9%  | (-136 to 50) |

\*Adjusted model includes Network site, age (tail-restricted cubic spline for all age group analyses, linear within age groups), calendar time (2-week intervals), and any high-risk code in prior year

†Adults aged ≥50 years with unknown vaccine type are assumed to be IIV and are excluded from IIV3 SD, IIV3 HD, and IIV4 analyses

‡All Wisconsin enrollees were excluded from A(H3N2) analyses as there were no A(H3N2) cases at the Wisconsin site

§Wisconsin had only one case of B/Victoria, of unknown vaccine type. Wisconsin was included in the any vaccine analyses but not the others

### Supplemental Table 3

Sensitivity analyses for estimated influenza vaccine effectiveness against any influenza, overall and stratified by age group and vaccine type

| Age group/Vaccine type                                              | Influenza Positive      |      | Influenza Negative      |      | Vaccine effectiveness |              |           |             |
|---------------------------------------------------------------------|-------------------------|------|-------------------------|------|-----------------------|--------------|-----------|-------------|
|                                                                     | No.<br>vaccinated/Total | (% ) | No.<br>vaccinated/Total | (% ) | Unadjusted            |              | Adjusted* |             |
|                                                                     |                         |      |                         |      | (%)                   | (95% CI)     | VE<br>%   | 95% CI      |
| <i>1. Include partially vaccinated children aged &lt;9 years</i>    |                         |      |                         |      |                       |              |           |             |
| <i>Any vaccine</i>                                                  |                         |      |                         |      |                       |              |           |             |
| Overall                                                             | 516/1331                | 38.8 | 3040/5708               | 53.3 | 44                    | (37 to 51)   | 48        | (41 to 55)  |
| 6 months - 8 years                                                  | 109/276                 | 39.5 | 768/1410                | 54.5 | 45                    | (29 to 58)   | 49        | (32 to 62)  |
| 2 years - 8 years                                                   | 87/240                  | 36.3 | 510/1035                | 49.3 | 41                    | (22 to 56)   | 50        | (31 to 63)  |
| 2 years - 17 years                                                  | 120/404                 | 29.7 | 787/1729                | 45.5 | 49                    | (36 to 60)   | 53        | (40 to 64)  |
| <i>Any IIV</i>                                                      |                         |      |                         |      |                       |              |           |             |
| Overall                                                             | 475/1290                | 36.8 | 2907/5575               | 52.1 | 47                    | (39 to 53)   | 51        | (44 to 57)  |
| 2 years - 8 years                                                   | 59/212                  | 27.8 | 434/959                 | 45.3 | 53                    | (35 to 66)   | 57        | (39 to 70)  |
| 2 years - 17 years                                                  | 82/366                  | 22.4 | 673/1615                | 41.7 | 60                    | (47 to 69)   | 61        | (48 to 71)  |
| <i>LAIV4</i>                                                        |                         |      |                         |      |                       |              |           |             |
| Overall                                                             | 40/677                  | 5.9  | 117/2175                | 5.4  | -10                   | (-60 to 24)  | 7         | (-39 to 38) |
| 2 years - 8 years                                                   | 28/181                  | 15.5 | 73/598                  | 12.2 | -32                   | (-111 to 18) | 9         | (-55 to 46) |
| 2 years - 17 years                                                  | 38/322                  | 11.8 | 111/1053                | 10.5 | -14                   | (-68 to 23)  | 9         | (-39 to 41) |
| <i>2. Restrict to those enrolled &lt;5 days after illness onset</i> |                         |      |                         |      |                       |              |           |             |
| <i>Any vaccine</i>                                                  |                         |      |                         |      |                       |              |           |             |
| Overall                                                             | 376/1041                | 36.1 | 1915/3716               | 51.5 | 47                    | (39 to 54)   | 51        | (43 to 59)  |
| 6 months - 8 years                                                  | 62/187                  | 33.2 | 479/951                 | 50.4 | 51                    | (32 to 65)   | 56        | (36 to 69)  |
| 9-17 years                                                          | 30/142                  | 21.1 | 215/530                 | 40.6 | 61                    | (39 to 75)   | 58        | (32 to 74)  |

|                                                      |          |      |           |      |     |            |    |             |
|------------------------------------------------------|----------|------|-----------|------|-----|------------|----|-------------|
| 18-49 years                                          | 124/421  | 29.5 | 559/1311  | 42.6 | 44  | (29 to 56) | 49 | (34 to 61)  |
| 50-64 years                                          | 113/219  | 51.6 | 326/527   | 61.9 | 34  | (10 to 52) | 32 | (4 to 52)   |
| ≥65 years                                            | 47/72    | 65.3 | 336/397   | 84.6 | 66  | (40 to 80) | 69 | (42 to 83)  |
| <b>3. Use self-reported vaccination status only†</b> |          |      |           |      |     |            |    |             |
| <i>Any vaccine</i>                                   |          |      |           |      |     |            |    |             |
| Overall                                              | 442/1090 | 40.6 | 2521/4495 | 56.1 | 47  | (39 to 53) | 50 | (42 to 57)  |
| 6 months - 8 years                                   | 99/212   | 46.7 | 593/1010  | 58.7 | 38  | (17 to 54) | 44 | (23 to 60)  |
| 9-17 years                                           | 35/142   | 24.7 | 223/516   | 43.2 | 57  | (35 to 72) | 57 | (33 to 73)  |
| 18-49 years                                          | 128/423  | 30.3 | 762/1646  | 46.3 | 50  | (37 to 60) | 55 | (43 to 65)  |
| 50-64 years                                          | 116/227  | 51.1 | 473/755   | 62.7 | 38  | (16 to 54) | 36 | (11 to 53)  |
| ≥65 years                                            | 64/86    | 74.4 | 470/568   | 82.8 | 39  | (-3 to 64) | 38 | (-11 to 65) |
| <b>4. Use EMR-confirmed vaccination status only</b>  |          |      |           |      |     |            |    |             |
| <i>Any vaccine</i>                                   |          |      |           |      |     |            |    |             |
| Overall                                              | 459/1311 | 35   | 2714/5580 | 48.6 | 43  | (36 to 50) | 46 | (38 to 53)  |
| 6 months - 8 years                                   | 87/254   | 34.3 | 630/1272  | 49.5 | 47  | (30 to 60) | 51 | (33 to 64)  |
| 9-17 years                                           | 33/164   | 20.1 | 271/695   | 39   | 61  | (41 to 74) | 57 | (33 to 72)  |
| 18-49 years                                          | 126/500  | 25.2 | 741/1961  | 37.8 | 45  | (31 to 56) | 50 | (37 to 61)  |
| 50-64 years                                          | 136/283  | 48.1 | 501/920   | 54.5 | 23  | (-1 to 41) | 19 | (-7 to 39)  |
| ≥65 years                                            | 77/110   | 70   | 571/732   | 78   | 34  | (-3 to 58) | 34 | (-5 to 59)  |
| <b>5. Comparison-adjusted model‡</b>                 |          |      |           |      |     |            |    |             |
| <i>Any vaccine</i>                                   |          |      |           |      |     |            |    |             |
| Overall                                              | 494/1309 | 37.7 | 2902/5570 | 52.1 | na§ | na         | 48 | (40 to 54)  |
| 6 months - 8 years                                   | 87/254   | 34.3 | 630/1272  | 49.5 | na  | na         | 51 | (33 to 64)  |
| 2-8 years                                            | 75/228   | 32.9 | 436/961   | 45.4 | na  | na         | 48 | (27 to 63)  |
| 2-17 years                                           | 108/392  | 27.6 | 713/1655  | 43.1 | na  | na         | 52 | (38 to 63)  |
| 9-17 years                                           | 33/164   | 20.1 | 277/694   | 39.9 | na  | na         | 60 | (37 to 74)  |
| 18-49 years                                          | 146/499  | 29.3 | 841/1957  | 43.0 | na  | na         | 49 | (35 to 60)  |
| 50-64 years                                          | 150/283  | 53.0 | 562/918   | 61.2 | na  | na         | 24 | (-1 to 43)  |

|                                                                                                         |          |      |           |      |    |            |    |            |
|---------------------------------------------------------------------------------------------------------|----------|------|-----------|------|----|------------|----|------------|
| ≥65 years                                                                                               | 78/109   | 71.6 | 592/729   | 81.2 | na | na         | 41 | (4 to 64)  |
| <i>6. Including influenza-negative subjects enrolled outside periods of local influenza circulation</i> |          |      |           |      |    |            |    |            |
| <i>Any vaccine</i>                                                                                      |          |      |           |      |    |            |    |            |
| Overall                                                                                                 | 494/1309 | 37.7 | 3076/5991 | 51.3 | 43 | (35 to 49) | 48 | (41 to 55) |

\*Adjusted model includes site, age (tail-restricted cubic spline for all age group analyses, linear within age groups), calendar time (2-week intervals), and any high-risk code in prior year

†Excludes Wisconsin enrollees, for whom vaccine status was determined solely from EIR data

‡Comparison adjusted model includes site, age (spline for all ages, years for age groups), race/Hispanic ethnicity, interval from onset to enrollment, sex, general self-rated health status, calendar time (2-week intervals), and any high-risk code in the year prior to enrollment

§na = not applicable
